# Supplementary material for: Coupling of kenaf Biochar and Magnetic BiFeO3 onto Cross-Linked Chitosan for Enhancing Separation Performance and Cr(VI) Ions Removal Efficiency
Source: PubMed Central journal article supplement (PMC7037466; doi:10.3390/ijerph17030788), 2020-01-27
Supplement: ijerph-17-00788-s001.pdf [file ijerph-17-00788-s001.pdf]

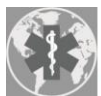

1 *Supplementary Material for*

2 **Coupling of kenaf biochar and magnetic BiFeO<sub>3</sub> onto**  
3 **cross-linked chitosan for enhancing separation**  
4 **performance and Cr(VI) ions removal efficiency**

5 **Daixi Zhou<sup>1</sup>, Guangyu Xie<sup>1</sup>, Xinjiang Hu<sup>1,\*</sup>, Xiaoxi Cai<sup>2</sup>, Yunlin Zhao<sup>4</sup>, Xi Hu<sup>1,\*</sup>, Qi Jin<sup>4</sup>, Xiaohua**  
6 **Fu<sup>1</sup>, Xiaofei Tan<sup>3</sup>, Chong Liang<sup>1</sup>, Kaiqi Lai<sup>1</sup>, Hui Wang<sup>1</sup>, Chunfang Tang<sup>1</sup>**

7 <sup>1</sup> College of Environmental Science and Engineering, Central South University of Forestry and  
8 Technology, Changsha 410004, P.R. China; daixizhou07@126.com (D.Z.); anyuxie@126.com (G.X.);  
9 xjhu@csuft.edu.cn (X.J.H.); T20152243@csuft.edu.cn (X.H.); T20031513@csuft.edu.cn (X.F.);  
10 15964519539@163.com (C.L.); lkq1799689599@163.com (K.L.); wanghui@csuft.edu.cn (H.W.);  
11 T20051104@csuft.edu.cn (C.T.)

12 <sup>2</sup> College of art and design, Hunan First Normal University, Changsha 410205, P.R. China;  
13 xiaoxi@hnu.edu.cn (X.C.)

14 <sup>3</sup> College of Environmental Science and Engineering, Hunan University, Changsha 410082, P.R.  
15 China; tanxf@hnu.edu.cn (X.T.)

16 <sup>4</sup> Faculty of Life Science and Technology, Central South University of Forestry and Technology,  
17 Changsha 410004, P.R. China; T20142201@csuft.edu.cn (Y.Z.); jq305745239@126.com (Q.J)

18

19 \* Correspondence: huxinjiang@126.com, xjhu@csuft.edu.cn (Xinjiang Hu); T20152243@csuft.edu.cn  
20 (Xi Hu)

21

22 Table S1 Experimental design matrix of the  $2^{5-1}$  FFD for Cr(VI) adsorption onto CKB. (A: pH, B:  
23 temperature, C: initial concentration of Cr(VI), D: NaCl, E:  $\text{KH}_2\text{PO}_4$ )  
24

| Run number | Values of independent variables* |    |    |      |      |
|------------|----------------------------------|----|----|------|------|
|            | A                                | B  | C  | D    | E    |
| 1          | 2                                | 50 | 90 | 0.1  | 0.01 |
| 2          | 2                                | 10 | 90 | 0.1  | 0.1  |
| 3          | 6                                | 50 | 90 | 0.01 | 0.01 |
| 4          | 6                                | 50 | 90 | 0.1  | 0.1  |
| 5          | 6                                | 10 | 90 | 0.01 | 0.1  |
| 6          | 2                                | 10 | 90 | 0.01 | 0.01 |
| 7          | 2                                | 50 | 90 | 0.01 | 0.1  |
| 8          | 6                                | 10 | 90 | 0.1  | 0.01 |
| 9          | 2                                | 10 | 10 | 0.01 | 0.1  |
| 10         | 6                                | 10 | 10 | 0.01 | 0.01 |
| 11         | 6                                | 50 | 10 | 0.01 | 0.1  |
| 12         | 2                                | 50 | 10 | 0.1  | 0.1  |
| 13         | 2                                | 50 | 10 | 0.01 | 0.01 |
| 14         | 6                                | 10 | 10 | 0.1  | 0.1  |
| 15         | 2                                | 10 | 10 | 0.1  | 0.01 |
| 16         | 6                                | 50 | 10 | 0.1  | 0.01 |

25

26

27 The regeneration ability of an adsorbent is considered as a significant factor to assess its  
28 cost-effectiveness [1] [2]. In order to investigate the regenerability and reusability of CKB, the  
29 adsorption-desorption cycle experiments were performed on CKB. At first, 12 mg/g of Cr(VI) was  
30 loaded onto CKB by contacting 0.2 g CKB with 50 mg/L of Cr(VI) solution (50 mL) at pH 2.0 in a  
31 thermostatic shaker at 150 rpm under 30 °C. Then for desorption, Cr(VI)-loaded CKB was separated  
32 from solutions using a magnet and then washed by ultrapure water for three times. Next,  
33 Cr(VI)-loaded CKB was contacted with 50 mL of 0.5 M NaOH in a thermostatic shaker at 150 rpm  
34 under 30 °C. After washing CKB by ultrapure water for three times, the adsorbent was reused in  
35 the next adsorption cycle. Three consecutive adsorption-desorption cycles were examined.

36 As shown in the first two cycles in Fig. S1, the adsorption capacity of CKB was 12 mg/g. In the  
37 third cycle the adsorption capacity of CKB was slightly reduced to 9 mg/g. Therefore, CKB can be  
38 successfully reused for two adsorption-desorption cycles without loss of its original adsorption  
39 capacity.

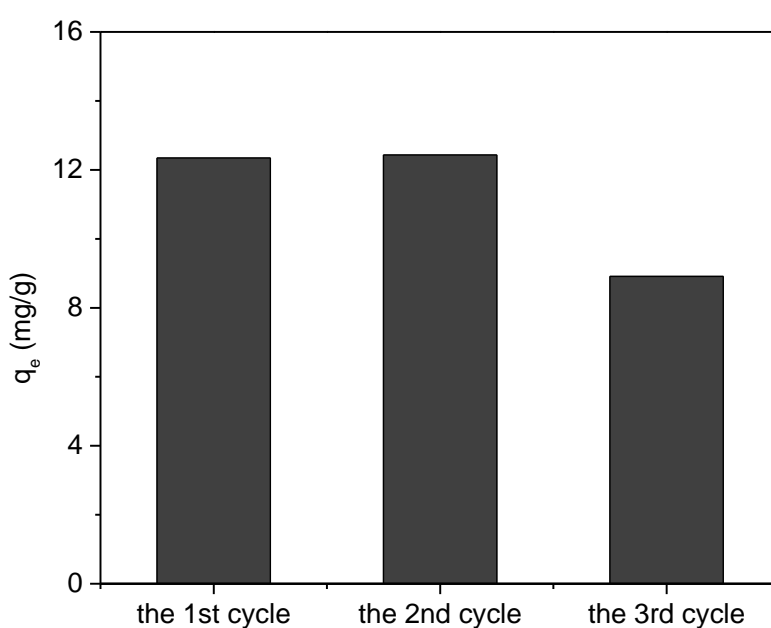

40

41 Figure S1. Reuse experiment of CKB for three cycles:  $C_{0Cr(VI)} = 50\text{mg/L}$ ,  $W = 0.2\text{ g}$ ,  $T = 30\text{ °C}$ ,  $t = 4\text{ h}$ ,  
42  $\text{pH} = 2$ .

43

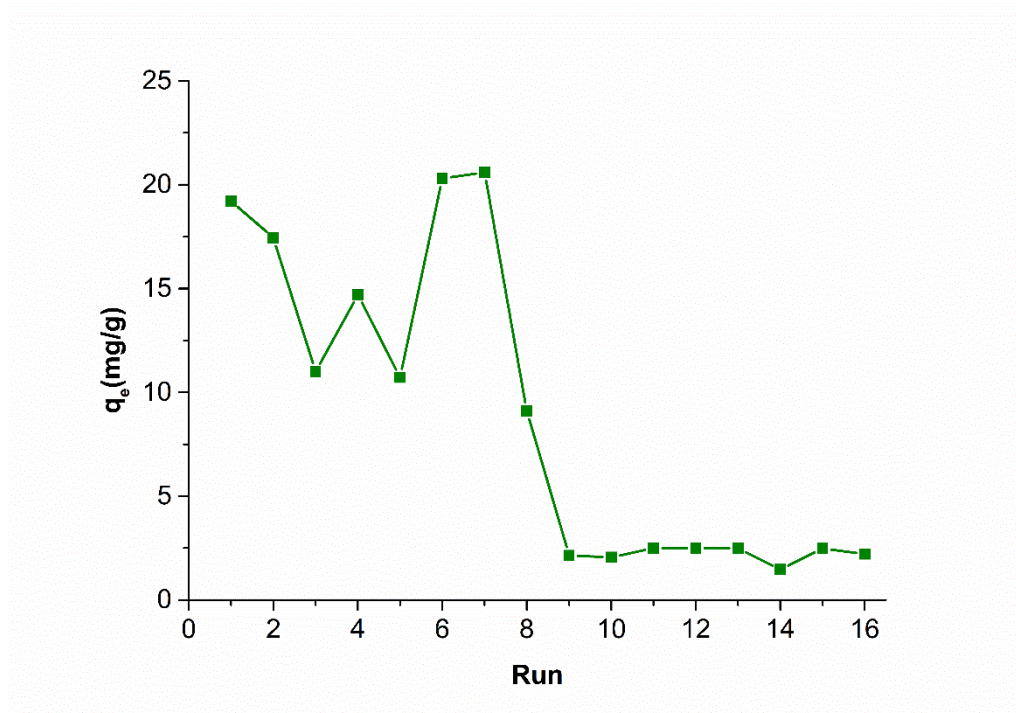

44

45

46

Figure S2 Cr(VI) removal onto CKB under various experimental conditions designed by 2<sup>5-1</sup> FFD

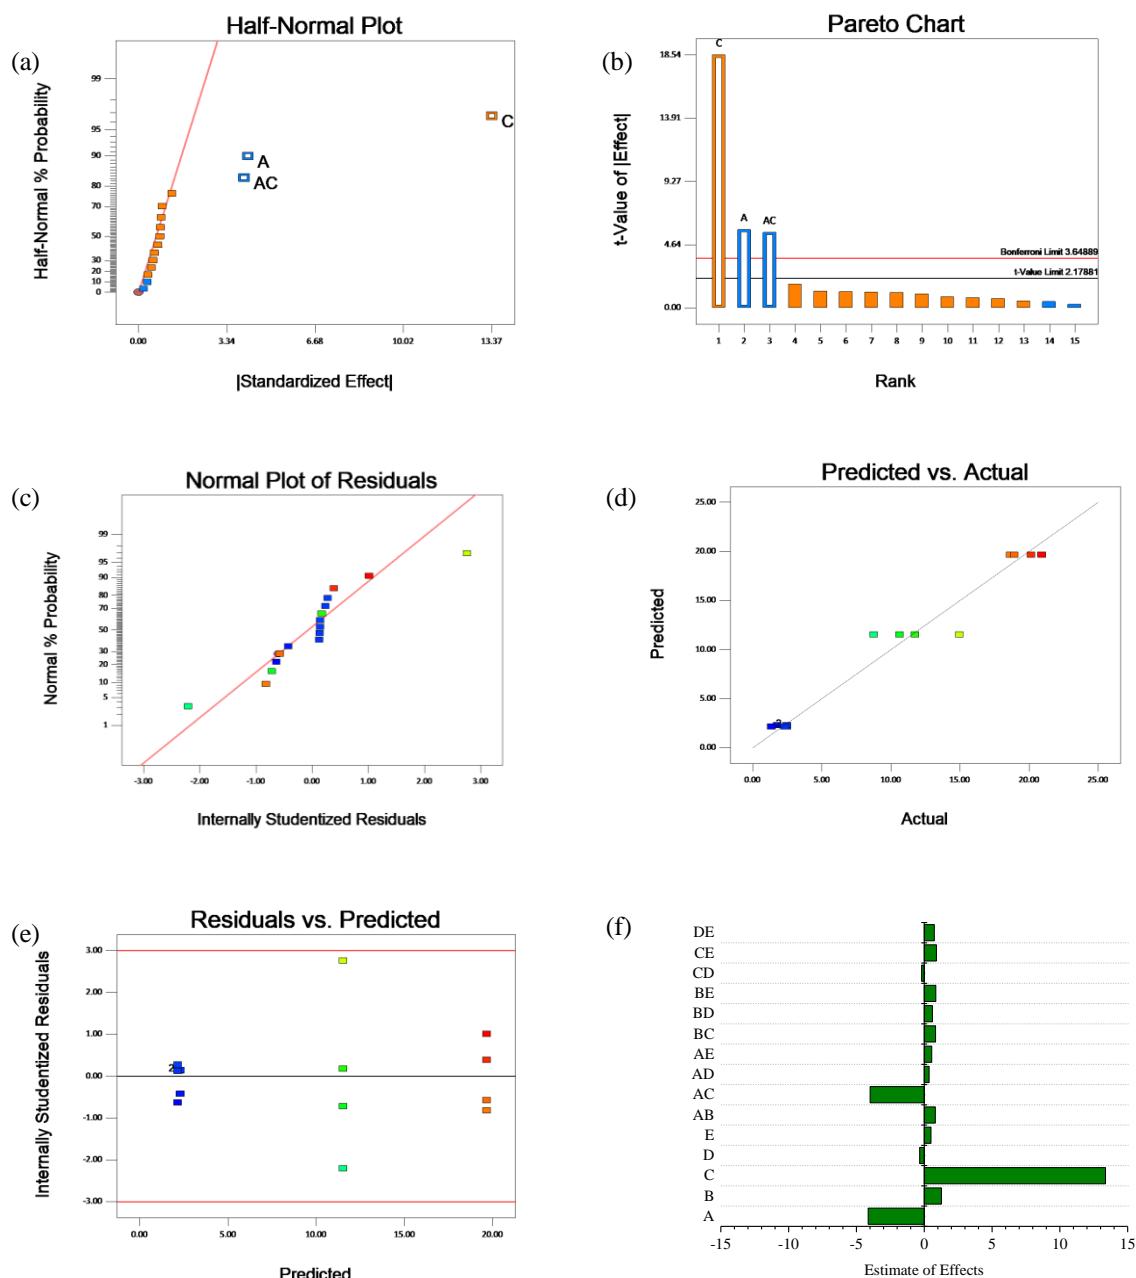

47

48 Figure S3 (a) Half-normal probability plot; (b) Pareto chart; (c) Normal plot of residuals; (d)  
 49 Comparison of predicted and experimental adsorption capacities; (e) Plots of internally  
 50 standardized residuals with predicted values; (f) Estimates of effects: Identification of main factors  
 51 and interaction factors on Cr(VI) adsorption by CKB: (A) pH; (B) Temperature; (C) initial  
 52 concentration of Cr(VI); (D) NaCl; (E) KH<sub>2</sub>PO<sub>4</sub>.

53

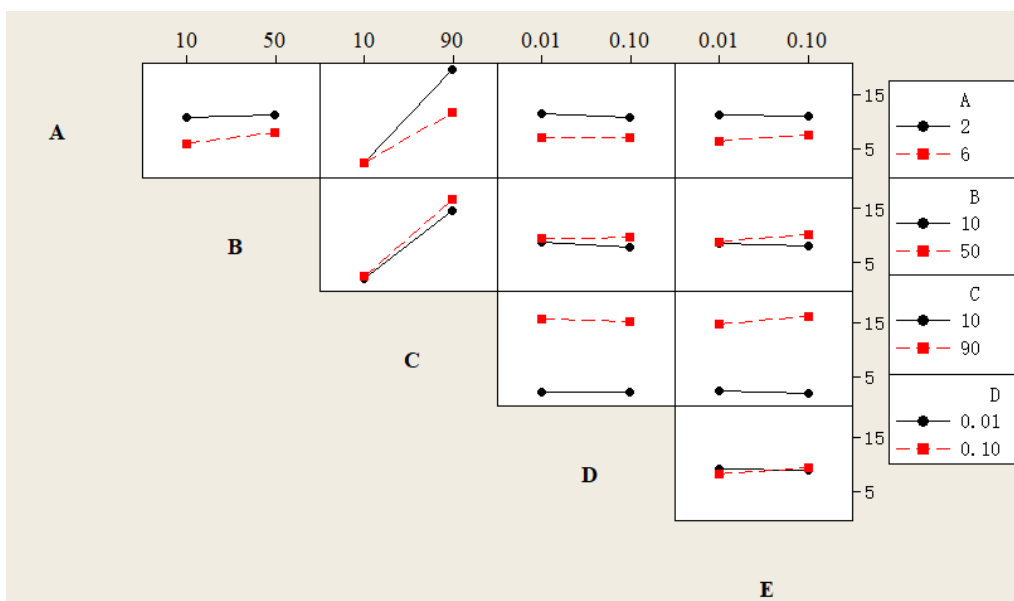

54  
55  
56  
57  
58

Figure S4 Interaction effects plot for Cr(VI) decontamination: (A) pH; (B) Temperature; (C) initial concentration of Cr(VI); (D) NaCl; (E) KH<sub>2</sub>PO<sub>4</sub>.

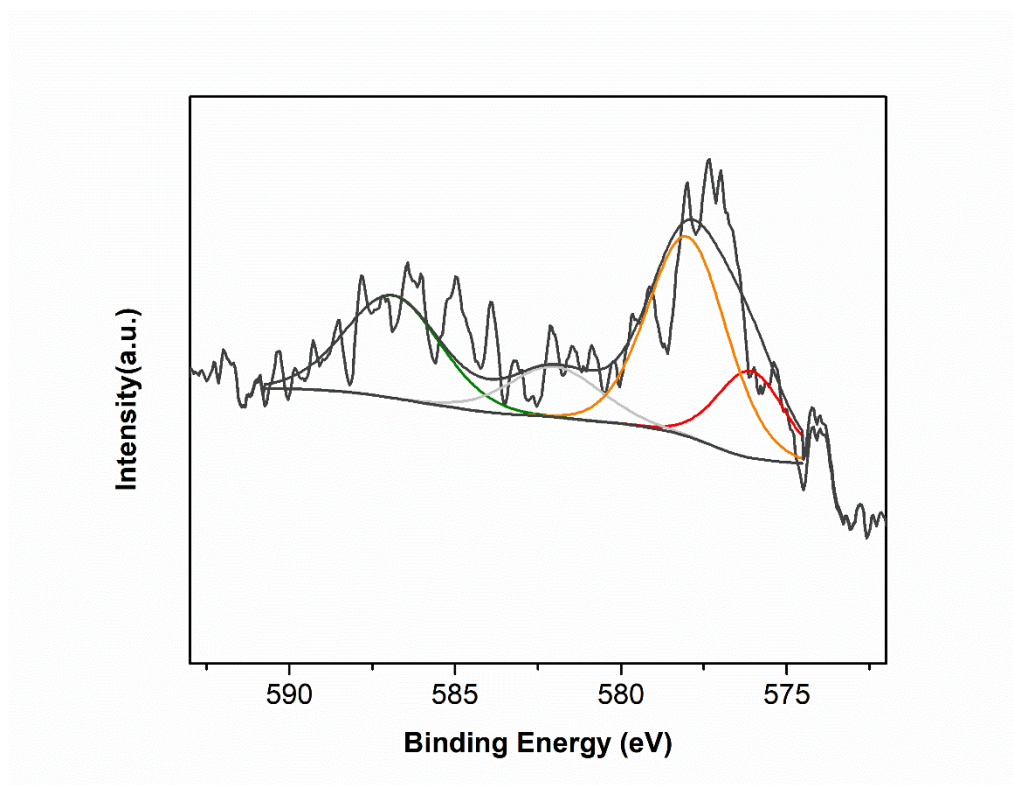

59

60

Figure. S5 Cr 2p XPS spectra of CKB after adsorption.

61

## 62 References

- 63 1. Bhaumik, M.; Maity, A.; Srinivasu, V.V.; Onyango, M.S. Enhanced removal of Cr(VI) from  
64 aqueous solution using polypyrrole/Fe<sub>3</sub>O<sub>4</sub> magnetic nanocomposite. *Journal of hazardous*  
65 *materials* **2011**, *190*, 381-390, doi:10.1016/j.jhazmat.2011.03.062.
- 66 2. Vilardi, G.; Ochando-Pulido, J.M.; Stoller, M.; Verdone, N.; Di Palma, L. Fenton oxidation  
67 and chromium recovery from tannery wastewater by means of iron-based coated biomass  
68 as heterogeneous catalyst in fixed-bed columns. *Chemical Engineering Journal* **2018**, *351*, 1-11,  
69 doi:10.1016/j.cej.2018.06.095.

70
